1     **Analysis of spatiotemporal specificity of small RNAs**  
2             **regulating hPSC differentiation and beyond**

3  
4     Lu Li <sup>1,2,\*</sup>, JinFeng Li <sup>3</sup>, DanDan Cao <sup>1</sup>, Vassilios Papadopoulos <sup>2</sup>, WaiYee Chan <sup>1,\*</sup>

5     <sup>1</sup> CUHK-CAS GIBH Joint Research Laboratory on Stem Cell and Regenerative  
6     Medicine, School of Biomedical Sciences, the Chinese University of Hong Kong,  
7     Shatin, N.T., Hong Kong SAR;

8     <sup>2</sup> Department of Pharmacology and Pharmaceutical Sciences, School of Pharmacy,  
9     University of Southern California, Los Angeles, CA, USA;

10    <sup>3</sup> Department of Computer Science and Engineering, the Chinese University of Hong  
11    Kong, Shatin, N.T., Hong Kong SAR;

12    \* Corresponding author, E-Mail: [lli172@usc.edu](mailto:lli172@usc.edu) (L.L.); [chanwy@cuhk.edu.hk](mailto:chanwy@cuhk.edu.hk)  
13    (W.Y.C.); Tel.: +852-3943-1383; Fax: +852-2603-7902.

14    Keywords: Induced pluripotent stem cells; Small RNAs; Microarrays; Data mining;  
15    Data publication and archiving.

16  
17  
18  
19  
20  
21  
22  
23  
24  
25  
26  
27  
28

## 29 **Abstract**

30 We present a quantitative analysis of small RNA dynamics during the transition  
31 from hPSCs to the three germ layer lineages to identify spatiotemporal-specific small  
32 RNAs that may be involved in hPSC differentiation. To determine the degree of  
33 spatiotemporal specificity, we utilized two algorithms, namely normalized maximum  
34 timepoint specificity index (NMTSI) and across-tissue specificity index (ASI). NMTSI  
35 could identify spatiotemporal-specific small RNAs that go up or down at just one  
36 timepoint in a specific lineage. ASI could identify spatiotemporal-specific small RNAs  
37 that maintain high expression from intermediate timepoints to the terminal timepoint in  
38 a specific lineage. Beyond analyzing single small RNAs, we also quantified the  
39 spatiotemporal-specificity of microRNA families and observed their differential  
40 expression patterns in certain lineages. To clarify the regulatory effects of group  
41 miRNAs on cellular events during lineage differentiation, we performed a gene  
42 ontology (GO) analysis on the downstream targets of synergistically up- and  
43 downregulated microRNAs. To provide an integrated interface for researchers to  
44 access and browse our analysis results, we designed a web-based tool at  
45 <https://keyminer.pythonanywhere.com/km/>.

46

47

48

49

50

51

52

53

54

55

56

## 57 **Introduction**

58 Human pluripotent stem cells (hPSCs) have emerged as a new model system for  
59 understanding the mechanism underlying human embryonic development<sup>1</sup>. In addition,  
60 the functional cells derived from hPSCs have been considered as novel cell sources for  
61 replacement therapy and drug selection<sup>2-4</sup>. Identification of critical members of  
62 different molecule classes regulating the hPSC differentiation process is essential for  
63 hPSC-based clinical applications that require a comprehensive understanding of both  
64 physiological and pathological mechanisms. hPSC differentiation is substantially  
65 regulated in both lineage and time, which is analogous to “spatiotemporal regulation”  
66 in human embryogenesis<sup>5,6</sup>. Therefore, the molecules that change in a  
67 spatiotemporal-specific manner may also control hPSC differentiation in both  
68 dimensions.

69 The profiling study of transcriptional and epigenetics dynamics during the  
70 differentiation of hPSCs, reported by Gifford *et al*, clarified the transcriptome changes,  
71 DNA methylation alterations, and chromatin modification dynamics during the  
72 formation of the three germ layers derived from hPSCs<sup>7</sup>. In the same year, Xie *et al*  
73 profiled the transcriptome and epigenome of several cell states differentiated from  
74 hPSCs that represent key developmental decisions in the embryo<sup>8</sup>. From these efforts,  
75 an integrated atlas of spatiotemporal dynamics of hPSC differentiation began to emerge.  
76 However, for the class of small RNAs, which is a critical player in guiding the  
77 differentiation of hPSCs<sup>9-14</sup>, there is less information in this atlas. To date, the most  
78 comprehensive analysis of small RNA abundance in human tissues was performed by  
79 Ludwig *et al*, revealing the specific distribution of microRNAs (miRNAs) in mature  
80 tissues<sup>15</sup>. For the three germ layers and their later cell derivatives corresponding to less  
81 mature states, the miRNA transcriptome (miRNAome) remains largely unexplored. In  
82 addition, most of the previous studies focused only on miRNAs while ignoring other  
83 small RNAs, including pre-miRNAs, snoRNAs, CDBox RNAs, H/ACA Box RNAs,  
84 and scaRNAs, which also could potentially regulate early embryogenesis<sup>16</sup>.

85 Small RNAs are considered as master regulators of numerous transcription factors  
86 that directly control hPSC differentiation<sup>17,18</sup>. In general, when small RNAs regulate  
87 differentiation, they are either transiently upregulated in the intermediate state of  
88 differentiation or maintained with high expression to the mature state<sup>14,19-21</sup>. In our

89 studies, if such temporal changes in expression appear in only one lineage, we defined  
90 them as spatiotemporal-specific small RNAs.

91 Recently, our group has profiled the expression dynamics of small RNAs during  
92 differentiation of human induced PSCs (hiPSCs) toward three key lineages (hepatic,  
93 nephric and neuronal) that are representative of the three germ layers<sup>22</sup>. Using this  
94 dataset, we performed a hierarchical clustering analysis to reveal  
95 spatiotemporal-specific small RNAs. However, since this analysis tends to be biased  
96 against spatiotemporal-specific small RNAs with less change over time, this analysis  
97 provided only an incomplete list. Further, it was incapable of indicating the degree of  
98 spatiotemporal specificity of any of the hits. In this paper, we performed a quantitative  
99 analysis of the expression dynamics of small RNAs to determine their degrees of  
100 spatiotemporal specificity. In addition, our quantitative algorithms enabled the  
101 identification of small RNAs with unique expression patterns even their changes in  
102 expression might be small.

103 We developed two different methods to determine the spatiotemporal specificity.  
104 The first method used a normalized maximum timepoint specificity index (NMTSI) to  
105 identify changes in spatiotemporal-specific small RNA expression levels at just one  
106 timepoint in comparison to other timepoints. The second method used an across-tissue  
107 specificity index (ASI) to find spatiotemporal-specific small RNAs that are either  
108 specifically expressed at the terminal timepoint or maintained at high expression levels  
109 from an intermediate to the terminal timepoint.

110 Beyond the analysis of single small RNA, we further investigated the group  
111 behaviour of small RNAs, which is important for understanding how small RNAs  
112 contributes to differentiation when they cooperate with each other. We looked at the  
113 spatiotemporal specificity of miRNA families, which have been reported as clusters of  
114 small RNAs that share common targets and regulate signalling pathways  
115 synergistically<sup>23,24</sup>. To show the spatiotemporal specificity of miRNA families, we  
116 calculated mean ASI and number of spatiotemporal-specific miRNAs inside each  
117 family. Besides, we also analyzed the functions of spatiotemporal-specific miRNAs  
118 that are synergistically changed in expression. To clarify their regulatory effects on

119 cellular events during lineage differentiation, we performed a gene ontology (GO)  
120 analysis on the downstream targets of co-upregulated or co-downregulated miRNAs.

121 To provide easy access to our dynamic small RNAs expression atlas, we  
122 implemented a web-based repository that includes all important analysis results. The  
123 information of small RNAs can be retrieved using their names as the key. This website  
124 is freely available at <https://keyminer.pythonanywhere.com/km/>.

125

## 126 **Results**

### 127 **Identification of spatiotemporal-specific small RNAs with NMTSI**

128 In our previous study, the profiling was performed on hepatocyte differentiation  
129 (HD), nephron progenitor differentiation (KD), and neural progenitor differentiation  
130 (ND) that were derived from the same hPSCs. Samples for profiling were collected at  
131 day 0, 3, 6, 10 of differentiation of the three lineages. In this study, we searched for the  
132 small RNAs that go up or down at just one timepoint in a specific lineage.

133 We first evaluated the degree of temporal specificity of small RNAs. Briefly, we  
134 used timepoint specificity index (TSI) as a graded scalar to measure the specificity of  
135 expression of a small RNA with respect to different timepoints<sup>15,25,26</sup>. TSI of single  
136 small RNAs in HD, KD, and ND were calculated separately and summarized in Table  
137 S1 (column C-E). Since the normalization may affect the results<sup>15</sup>, we performed all  
138 analyses for TSI on raw data using raw expression intensity values (expression values).  
139 TSI has a range of 0 to 1, representing the expression dynamics of any small RNA  
140 ranging from ubiquitous expression at all timepoints (0) to specific expression at only  
141 one timepoint (1). In HD, 78.6% of all small RNAs showed an intermediate TSI value  
142 (Fig. 1A). Similarly, 79.3% of all small RNAs and 79.2% of all small RNAs showed an  
143 intermediate TSI value (0.1 to 0.6) in KD and ND, respectively (Fig. 1B, C), suggesting  
144 that most small RNAs change moderately during lineage differentiation.

145 Next, we established the spatiotemporal specificity of small RNAs as the lineage  
146 with the highest TSI among HD, KD, and ND (Table S1, column F). We also estimated  
147 the degree of spatiotemporal specificity by the NMTSI value, which was calculated by  
148 comparing the “weight” of TSI obtained from HD, KD, and ND (Table S1, column G).  
149 NMTSI values ranged from 0.33 to 0.86 (Fig. 1D), with values close to 1 stand for

150 small RNAs uniquely upregulated in only one lineage and values close to 0.33  
151 represent small RNAs either upregulated or unchanged together in all lineages. In total,  
152 35.9% of small RNAs showed a low NMTSI  $< 0.42$  and 62.2% of small RNAs showed  
153 an intermediate NMTSI (0.43 to 0.66) (Fig. 1D). 126 small RNAs showed a high  
154 NMTSI (0.67 to 0.88) (Fig. 1B), suggesting a strong spatiotemporal specificity in hPSC  
155 differentiation.

156 By ranking NMTSI values from the highest to the lowest in Table S1, the top 100  
157 small RNAs were revealed (NMTSI  $> 0.67$ , labelled in the blue background in Table  
158 S1). Particularly, *hsa-miR-4534*, *hsa-miR-1252-5p*, and *ENSG00000212567* (snoRNA)  
159 were the most spatiotemporal-specific small RNAs in HD, KD, and ND, respectively.  
160 Figure 1E showed that KD-specific *miR-1252-5p* and ND-specific *ENSG00000212567*  
161 were significantly changed at day 6 of KD (KD 6) and ND 6, suggesting that NMTSI is  
162 quite accurate in identifying spatiotemporal-specific candidate small RNAs. Different  
163 from obvious changes, the upregulation of HD-specific *miR-4534* at HD 3 was mild  
164 (Fig. 1E), indicating that NMTSI is sensitive in identifying spatiotemporal-specific  
165 candidate small RNAs despite their small changes in expression.

166 A concern remains that a small change in expression may be due to noise presented  
167 in low intensities, for which a further filtration with statistical significance should  
168 correct. For each small RNA, we processed the raw expression value to obtain the  
169 fold-change value and false discovery rate (FDR)-value when comparing the raw  
170 expression value between any of two timepoints. Thereafter, we set a cut-off of FDR  $<$   
171 0.05 with any fold-change (differential expression, DE) to find those small RNAs with  
172 a significant change in expression. By filtering candidate spatiotemporal-specific small  
173 RNAs obtained by NMTSI with a cut-off of DE, we got the final list of  
174 spatiotemporal-specific small RNAs (Table S2). In total, 330 HD-, 123 KD-, and 677  
175 ND-specific small RNAs were identified. Their NMTSI values, spatiotemporal  
176 specificity, fold-change values, and FDR-value were summarized in Table S2.

177 By ranking NMTSI values from maximum to minimum in the final list (Table S2,  
178 column D), we observed that *hsa-miR-5587-5p*, *hsa-miR-200c-3p*, and *hsa-miR-505-3p*  
179 showed the highest NMTSI value in HD, KD, and ND, respectively. Their normalized  
180 fold-change values were plotted in Figure 1F. All of them showed a timepoint-specific

181 expression in just one lineage, supporting the accuracy of the combination of NMTSI  
 182 and DE in the identification of spatiotemporal-specific small RNAs.

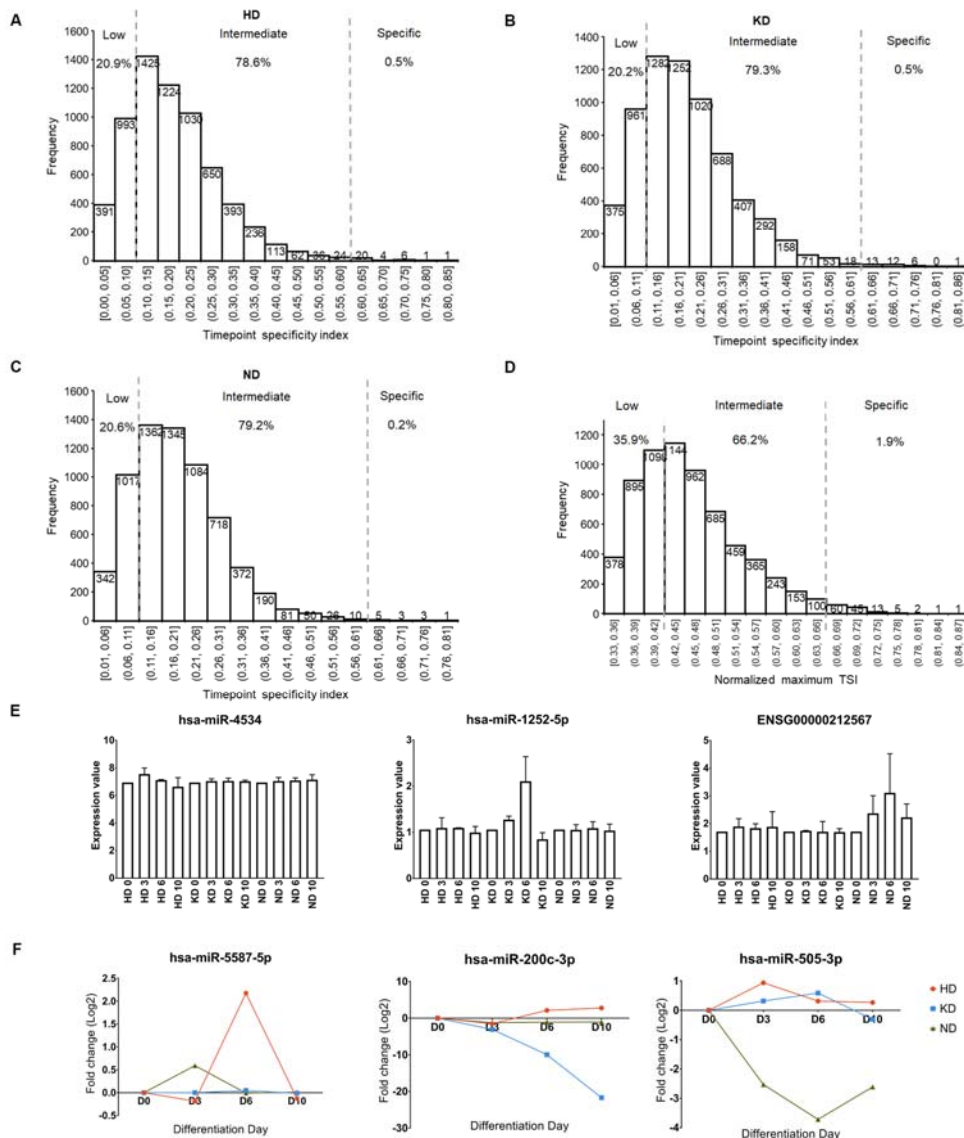

183

184

185 **Figure 1. Characterization of spatiotemporal-specific small RNA identified by NMTSI**  
 186 **and DE.**

187 (A-C) Histogram plot for the frequency of timepoint specificity index (TSI) of small RNAs  
 188 detected in hepatocyte differentiation (HD), nephron progenitor differentiation (KD), and  
 189 neural progenitor differentiation (ND). The vertical dotted lines correspond to the threshold  
 190 proposed for defining low expressed (< 0.11) and specifically expressed small RNAs (> 0.61).

191 (D) Normalized maximum TSI (NMTSI) distribution of small RNAs detected in hPSC

192 differentiation. The vertical dotted lines correspond to the threshold proposed for defining low  
193 expressed ( $< 0.42$ ) and specifically expressed small RNAs ( $> 0.66$ ) of spatiotemporal-specific  
194 candidates. (E) Bar plot of expression values (mean  $\pm$  SD) of spatiotemporal-specific candidate  
195 small RNAs with the highest NMTSI value in HD, KD, and ND, respectively. (F) Dynamic  
196 expression patterns of spatiotemporal-specific small RNAs with the highest NMTSI value in  
197 HD, KD, and ND, respectively.

198

### 199 **Identification of spatiotemporal-specific small RNAs with ASI**

200 In the analysis above, we used NMTSI to identify those small RNAs specifically  
201 going up or down at a single timepoint. However, some cell-fate determinants have  
202 been found to be highly expressed at more than one timepoint<sup>14,27,28</sup>. To identify these  
203 small RNAs, we used ASI to measure their degree of specificity at the terminal  
204 timepoint of different lineages.

205 In the dataset we studied (Data citation 1), day 10 of HD-, KD- and ND-cells  
206 correspond to three immature tissues, namely, immature hepatocytes (IH), metanephric  
207 mesenchyme (MM), and neural progenitor cells (NPC). For each small RNA, we  
208 calculated its ASI using the expression values of IH, MM and NPC. ASI values of all  
209 small RNAs were summarized in Table S3 (column F). ASI has a range of 0-1,  
210 indicating the distribution of small RNAs from ubiquitous expression (0) to specific  
211 expression (1) among various tissues. In total, 83.9% of small RNAs showed an  
212 intermediate ASI (0.1-0.6) (Fig. 2A). 110 small RNAs (1.7%) showed a high ASI (Fig.  
213 2A), suggesting a strong spatial specificity in hPSC differentiation. In parallel, the  
214 spatial specificity of each small RNA (column G) was established as the lineage with  
215 the highest expression value at day 10.

216 Sorting ASI values from maximum to minimum in Table S3, we found that  
217 *hsa-miR-122-5p* showed the highest ASI value (0.91). Since it is expressed the highest  
218 in IH among the three tissues, it is an IH-specific small RNA. Remarkably, its high  
219 level of expression is maintained from HD 6 to 10 (Fig. 2B), indicating that the capacity  
220 of ASI to identify tissue-specific small RNAs is not limited by the expression duration  
221 of small RNAs. Similarly, by ranking ASI values in Table S3, we found  
222 *hsa-miR-196a-5p* (ASI=0.87) and *hsa-miR-4285* (ASI=0.79) with the highest ASI in



223 MM and NPC, respectively, are highly expressed at more than two timepoints (Fig. 2B).

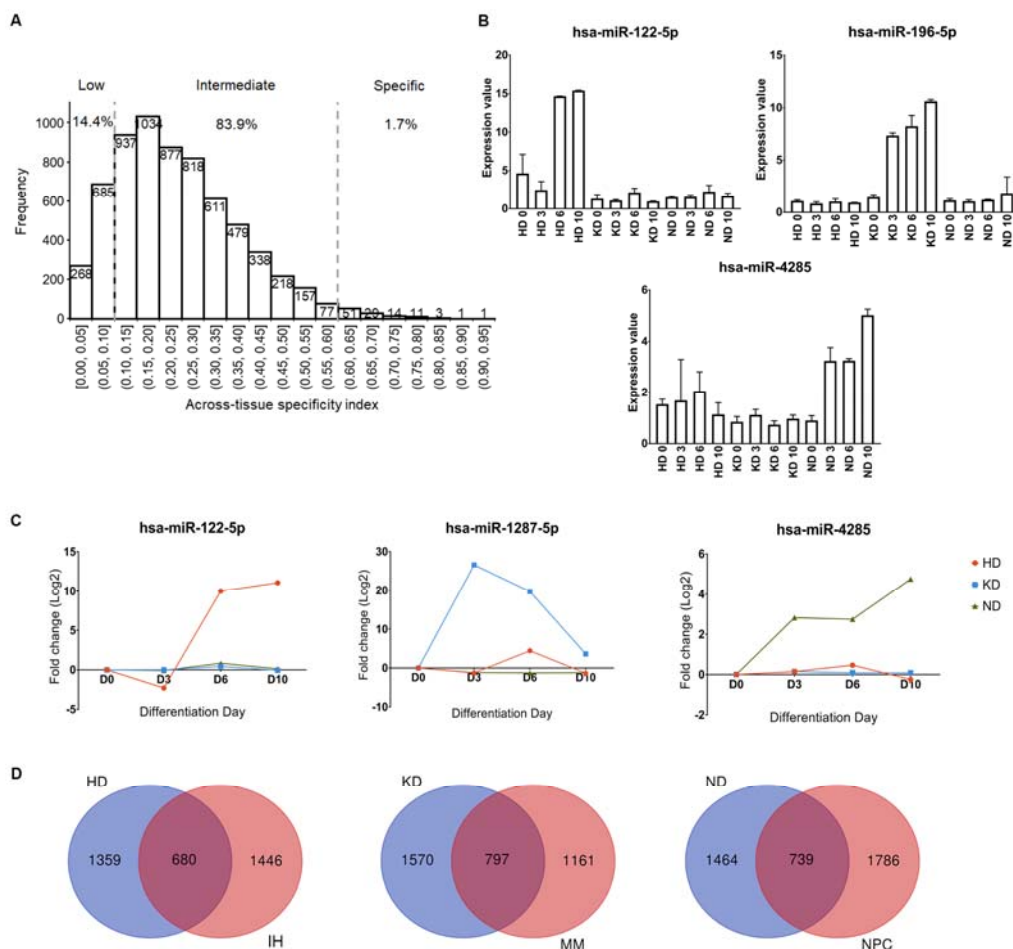

224

225 **Figure 2. Characterization of spatiotemporal-specific small RNA identified by ASI and**  
 226 **DE.**

227 (A) Across-tissue specificity index (ASI) distribution of small RNAs detected in hPSC  
 228 differentiation. The vertical dotted lines correspond to the threshold proposed for defining low  
 229 expressed (< 0.10) and specifically expressed small RNAs (> 0.60) in tissue-specific candidates.  
 230 (B) Bar plot of expression values (mean  $\pm$  SD) of tissue-specific candidate small RNAs with  
 231 the highest ASI value in immature hepatocytes (IH), metanephric mesenchyme (MM), and  
 232 neural progenitors (NPC), respectively. (C) Dynamic expression patterns of  
 233 spatiotemporal-specific small RNAs with the highest ASI value in IH, MM, and NPC,  
 234 respectively. (D) Venn diagram of spatiotemporal-specific candidate small RNAs indicated by  
 235 NMTSI analysis and spatiotemporal-specific candidate small RNAs indicated by ASI analysis  
 236 in HD, KD, and ND, respectively.

237 After establishing the spatial specificity of small RNAs, we determined the small  
238 RNAs, which also showed a temporal specificity. By filtering spatio-specific small  
239 RNAs obtained by ASI with a cut-off of DE (FDR-value < 0.05), the spatio-specific  
240 small RNAs with a temporal DE detected between any of two timepoints were revealed.  
241 In total, 195 IH-, 104 MM-, and 1019 NPC-specific small RNAs were identified as  
242 spatiotemporal-specific small RNAs. Their ASI values, spatiotemporal specificity,  
243 normalized fold-change values, and FDR-value were summarized in Table S4.

244 By ranking the ASI from the highest to the lowest in Table S4 (column D),  
245 *hsa-miR-122-5p*, *hsa-miR-1287-5p*, and *hsa-miR-4285* showed the highest ASI in IH,  
246 MM, and NPC, respectively. Their normalized fold changes were plotted in Figure 2C.  
247 Not surprisingly, they are all sustained high expression from intermediate timepoints to  
248 the terminal timepoint.

249 Notably, the lists of spatiotemporal-specific small RNAs identified by NMTSI and  
250 ASI partially overlap (Fig. 2D). It is probably due to ASI, which only counts the  
251 enrichment of small RNAs at day 10, leading to an inclusion of both small RNAs  
252 specifically expressed at day 10 and small RNAs with sustained high expression from  
253 intermediate timepoints.

254

### 255 **Spatiotemporal specificity of miRNA families**

256 Beyond looking into the spatiotemporal specificity of single small RNAs, we were  
257 also interested in the spatiotemporal specificity of small RNA clusters, e.g. miRNA  
258 families. We explored the lineage in which single miRNA families showing specific  
259 expression dynamics from the pluripotent state (day 0) to the differentiating states (day  
260 10). To determine the degree of the spatiotemporal specificity of miRNA families, we  
261 calculated the mean ASI for spatiotemporal-specific miRNAs inside each miRNA  
262 family. To display the distribution of miRNA families, the number of detected family  
263 members in IH, MM, and NPC was counted separately.

264 In total, 115 IH-, 69 MM-, and 553 NPC-specific miRNAs were extracted from Table  
265 S4 based on the type of small RNAs (column C). According to previous papers<sup>15,25</sup>, we  
266 focused on the miRNA families containing at least five known mature miRNAs.  
267 Therefore, 37 out of 589 miRNA families extracted from the miRbase V21 were

268 analyzed<sup>29</sup>.

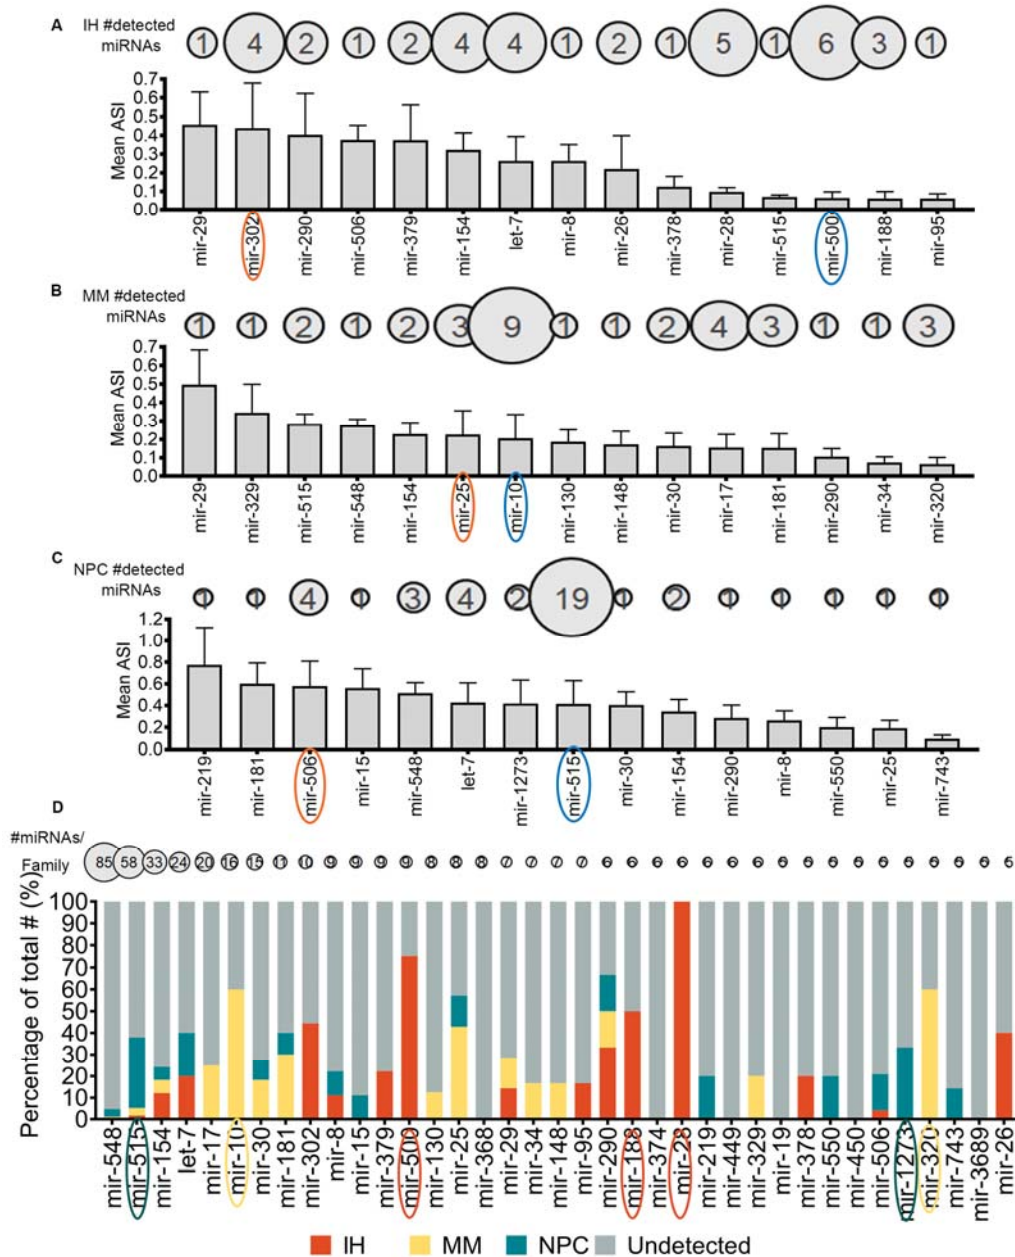

269

270 **Figure 3. Spatiotemporal specificity of miRNA families.**

271 Average of ASI in different miRNA families in (A) IH, (B) MM, and (C) NPC. For each  
 272 miRNA family with at least five known members, the mean and standard deviation of detected  
 273 family members ASI in a certain lineage is presented as a bar plot. Families are sorted with  
 274 decreasing average ASI from left to right. The number of detected family members is shown  
 275 above columns with balloons, representing the detected size. MiRNA families with the highest  
 276 mean ASI in IH, MM, and NPC are indicated by orange circles. MiRNA families with the

277 biggest number of spatiotemporal-specific family members in IH, MM and NPC are indicated  
278 by blue circles. (D) Inside each family, the number of IH-, MM-, NPC-, and undetected  
279 family members were compared, and the proportions presented as a percentage stacked bar  
280 plot. The number of total family members is shown above columns with balloons,  
281 representing the family size. MiRNA families showing a particularly high specificity in IH,  
282 MM, and NPC are indicated by red, yellow, and green circles, respectively.

283

284 For families with more than 3 members detected, mir-302 family, mir-25 family,  
285 and mir-506 family showed the highest mean ASI in IH, MM, and NPC, respectively  
286 (Fig. 3A-C, indicated by orange circles), suggesting a strong spatiotemporal specificity  
287 in lineage differentiation. Moreover, since mir-500 family, mir-10 family and, mir-515  
288 family have the greatest number of detected family members in IH, MM, and, NPC,  
289 respectively, they showed the most biased distribution in lineage differentiation  
290 among all families (Fig. 3 A-C, indicated by blue circles). The specificity and  
291 distribution of miRNA family members in three lineages were summarized in Table  
292 S5.

293 We then investigated the distribution of 37 families in lineage differentiation by  
294 estimating the percentage of spatiotemporal-specific family members inside a family in  
295 each lineage. Mir-28, mir-500, and mir-188 family showed a particularly high  
296 specificity in IH ( $\geq 50\%$  of family members were IH-specific) (Fig. 3D, indicated by  
297 red circles). mir-320 and mir-10 family showed a particularly high specificity in MM ( $\geq$   
298  $50\%$  of family members were MM-specific) (Fig. 3D, indicated by yellow circles).  
299 However, in ND, only mir-1273 and mir-515 family showed a slight NPC-specificity  
300 ( $\geq 30\%$  of family members were NPC-specific) (Fig. 3D, indicated by a blue circle),  
301 implicating that the formation of NPC is fine-tuned by a complicated miRNA  
302 regulatory system rather individual miRNA families.

303 If considering both a high average of ASI values (Fig. 3A-C) and a great  
304 percentage of spatiotemporal-specific members (Fig. 3D), mir-500 family, mir-10  
305 family, and mir-515 family are the most spatiotemporal-specific miRNA families.

306

### 307 **Functional analysis of spatiotemporal-specific miRNAs**

308 We further interpret the cellular events elicited by small RNAs expression  
309 dynamics. Given that the target genes of mature miRNAs are well-studied, we focused  
310 on the spatiotemporal miRNAs. Based on the list of spatiotemporal-specific miRNAs  
311 obtained by ASI (Table S4), we classified these miRNAs into six groups,  
312 corresponding to the miRNAs being upregulated at HD 10, KD 10 and ND 10 (fold  
313 change  $>1$  and  $FDR < 0.05$  when compared day 10 to day 0) or miRNAs being  
314 downregulated at HD 10, KD 10 and ND 10 (fold change  $< -1$  and  $FDR < 0.05$  when  
315 compared day 10 to day 0). The six groups are listed in Table S6 (column A, C, E, G, I,  
316 K). We then searched for target genes for each group of miRNAs using miRTarBase  
317 database. Their targets were summarized in Table S6 (column B, D, F, H, J, L).

318 Next, we performed a GO analysis on each group of targets using the web tool  
319 PANTHER version 14.1 (<http://www.pantherdb.org/tools/>)<sup>30</sup>. Statistical  
320 overrepresentation test terms under the “Gene List Analysis” function with  $FDR < 0.05$   
321 were considered significantly enriched. Fold enrichment was used as the ranking  
322 criteria (Table S7, column F). Consequently, we observed that different GO terms were  
323 associated with up- and downregulated miRNAs in these lineages (Table S7, column  
324 A). For example, in ND, the targets of upregulated miRNAs were enriched in the  
325 pathways related to brain development and neural tube formation (Fig. 4A); however,  
326 the targets of downregulated miRNAs were associated with eye development and  
327 noncoding RNA (ncRNA)-mediated translation process (Fig. 4B). The top 10 enriched  
328 GO terms for each group were clustered manually into biologically related topics (Fig.  
329 4A, B). All GO terms associated with six group of miRNAs were summarized in Table  
330 S7.

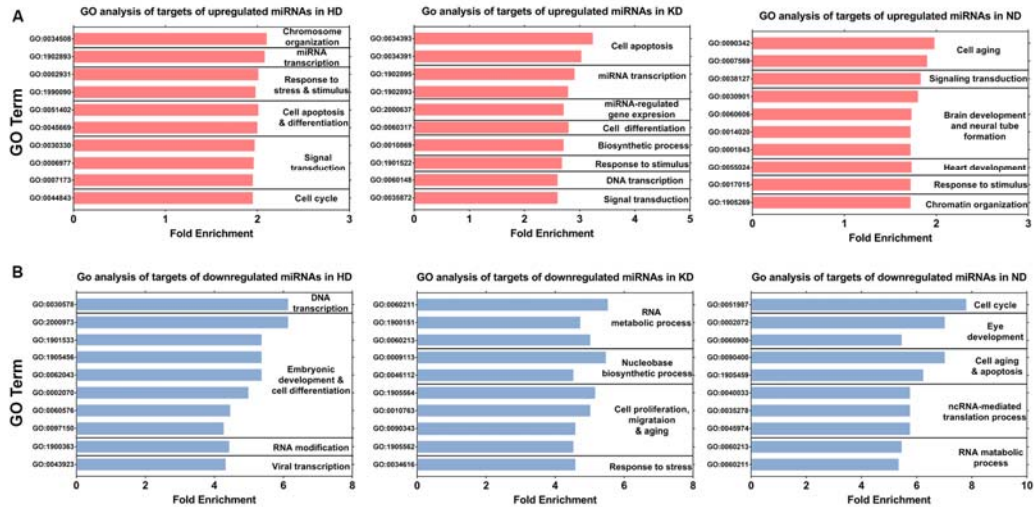

331

332 **Figure 4. Identification of functions of spatiotemporal-specific small RNAs during hPSC**  
 333 **differentiation.**

334 Gene ontology (GO) analysis for downstream targets of (A) upregulated miRNAs and (B)  
 335 downregulated miRNAs. The 10 most highly enriched GO biological process terms are  
 336 manually clustered into related topics for HD, KD and ND.

337

### 338 The search engine for small RNAs of interests

339 In order to share our experimental results with the scientific community at large,  
 340 we developed a search engine using Django that can quickly retrieve information with  
 341 regard to any specific small RNA. We have deployed this search engine on a website,  
 342 such that visitors can type in the name of a small RNA to retrieve all related  
 343 information. The search engine is available at:  
 344 <https://keyminer.pythonanywhere.com/km/>.

345 When a visitor types in the name of a small RNA of interest (e.g.,  
 346 *hsa-miR-181b-5p*), Django will pass this name as a text to our server. On receiving this  
 347 text, our server will look for the row that matches this text and return all data in this row  
 348 back to the browser for visualization. The front-end of the browser displays the  
 349 returned data in a pre-defined HTML table. The results will be shown as four separate  
 350 parts on the website (Fig. 5). The first part is the basic information of the searching  
 351 small RNA, including probe ID (e.g., MIMAT0000257\_st), name, NMTSI, ASI,  
 352 potential spatiotemporal specificity indicated by NMTSI (HD, KD, or ND), potential  
 353 spatiotemporal specificity indicated by ASI (IH, MM, or NPC). The second part is the

354 normalized fold change of the specified small RNA during differentiation of the three  
 355 lineages. The third part is the actual spatiotemporal specificity of a specified small  
 356 RNA. If the specified small RNA has no actual spatiotemporal specificity after a  
 357 filtration with DE, the result will be shown as a “#N/A”. The fourth part is the miRNA  
 358 family distribution, if a spatiotemporal-specific miRNA is specified and only if this  
 359 miRNA belongs to a miRNA family containing at least five members, the miRNA  
 360 family name (e.g., mir-181) and the family distribution figure will be shown. Our  
 361 website is able to replace cells in these HTML tables without reloading whole  
 362 webpages. An example of searching for a small RNA (*hsa-miR-181b-5p*) is shown in  
 363 Figure 5.

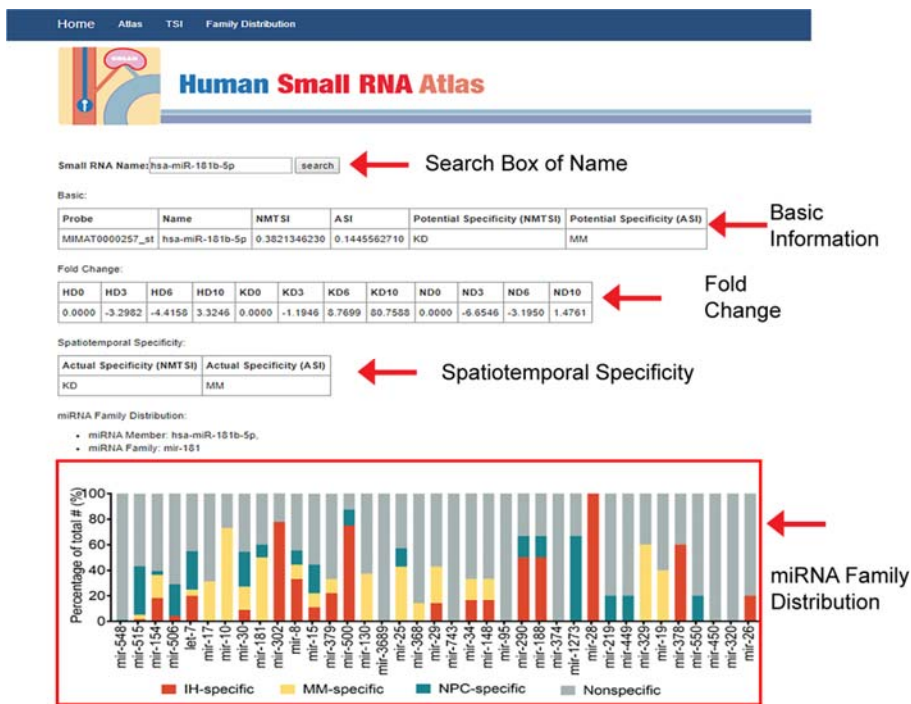

364

365 **Figure 5. The search engine for small RNAs of interests.**

366 The small RNA database entry for *hsa-miR-181b-5p*. Four sections of the page display from  
 367 top to bottom: the basic information, detected fold-changes in HD, KD and ND (day 0, 3, 6,  
 368 10), spatiotemporal specificity (indicated by NMTSI and ASI, respectively), and miRNA  
 369 family distribution. The actual spatiotemporal specificity of *hsa-miR-181b-5p* (MM,  
 370 identified by ASI and DE) indicates that it is located at the yellow stack of the family mir-181  
 371 bar.

372

## 373 **Discussion**

374 Since small RNAs have emerged as crucial cell fate determinants, there is an  
375 increasing need for the identification of small RNAs directing hPSC differentiation<sup>31</sup>.  
376 Tissue-specific small RNAs have been implicated in the regulation of lineage  
377 formation and in the maintenance of tissue properties<sup>14,19-21,32</sup>, whereas the small  
378 RNAs that determine early lineage differentiation remains largely unknown. Although  
379 there are ample studies investigating differentially expressed small RNAs during  
380 lineage differentiation, most of them profile only the expression dynamics in one  
381 lineage. Without comparisons among multiple lineages, it is difficult to determine  
382 whether the expression patterns are general in the reduction of stemness or unique in  
383 the differentiation of certain lineages. Additionally, due to the variable genetic  
384 background of hPSC donors and different profiling platforms, the results of these  
385 studies are difficult to integrate, limiting their applications in the comparison of small  
386 RNA dynamics. While our previous study profiled small RNA dynamics of  
387 multilineage differentiation derived from the same hPSCs avoided these concerns  
388 (Data citation 1), it still had limitations on fully identifying all spatiotemporal small  
389 RNAs involved in early differentiation.

390 Using our new analytical approach, we found more spatiotemporal-specific small  
391 RNAs (282 vs 1615). The increment in identified numbers are due to three main  
392 reasons: First, we adopted new analysis algorithms, namely NMTSI and ASI, as  
393 compared to hierarchical clustering algorithms used previously. NMTSI and ASI are  
394 quantitative scalar measures for the specificity of expression of small RNAs<sup>15</sup>. Their  
395 capacity to quantify spatiotemporal specificity allowed a more thorough investigation  
396 of spatiotemporal-specific small RNAs with either great or small expression changes  
397 when sorting the indices from the highest to the lowest. Secondly, using ASI we could  
398 identify small RNAs sustained high expression at more than one timepoint that are  
399 complementary to NMTSI identified small RNAs that are highly expressed at only one  
400 timepoint. This classification ensured more comprehensive coverage of  
401 spatiotemporal-specific small RNAs. Thirdly, we used absolute fold change > 1 instead  
402 of 2 as the criteria when filtering spatiotemporal-specific candidate small RNAs, by  
403 which the number of spatiotemporal-specific small RNAs was increased.



404 After the DE filtration, we observed an alteration in the list of the most  
405 spatiotemporal-specific small RNAs (Fig. 1E), in which *hsa-miR-4534*, *-1252-5p*, and  
406 *ENSG00000212567* were filtered out. Instead, *hsa-miR-5587-5p*, *-200c-3p*, and  
407 *-505-3p* became the most timepoint-specific small RNAs (Fig. 1F). *hsa-miR-4534* was  
408 filtered out due to a small change in expression during HD (Fig. 1E). *hsa-miR-1252-5p*  
409 and *ENSG00000212567* were excluded due to a non-significant difference (FDR-value >  
410 0.05), as implicated by the large bias of expression values between biological  
411 duplicates (Fig. 1E). Therefore, the DE filtration is necessary to exclude false positive  
412 results.

413 In the analysis of ASI and DE, *hsa-miR-122-5p*, *-1287-5p* and *-4285* have been  
414 identified as the most spatiotemporal-specific small RNAs (Fig. 2B, C). Consistent  
415 with existing studies, *hsa-miR-122-5p* is specifically correlated with hepatocyte  
416 formation<sup>33-35</sup>, while *hsa-miR-1287-5p* and *-4285* might be potential regulators of MM  
417 and NPC formation that require further studies.

418 Beyond the identification of single spatiotemporal-specific small RNAs, we also  
419 investigated the spatiotemporal specificity of miRNA families. For miRNA family  
420 members specifically distributed in single lineages, we calculated both mean ASI and  
421 the number of family members inside each family with respect to individual lineages to  
422 show their spatiotemporal specificity<sup>15</sup>. We found that the neural progenitor-enriched  
423 let-7 family ranking 6th in mean ASI and 2nd in the number of family members (Fig.  
424 3C), which suggested a strong spatiotemporal specificity in ND. This result is in line  
425 with previous studies that report an enrichment of let-7 family in neural progenitors  
426<sup>36,37</sup>.

427 Moreover, we found that several families presenting a spatiotemporal-specific  
428 distribution were previously unknown, such as IH-specific mir-302 family,  
429 MM-specific mir-10 family, and NPC-specific mir-515 family (Fig. 3A-C). Novel  
430 identification of these spatiotemporal-specific families shall aid in understanding how a  
431 miRNA family influences on lineage specification. Furthermore, the co-expression  
432 pattern of family members narrows down the range of downstream targets that helps to  
433 efficiently unmask critical cellular events accompanying hPSC differentiation<sup>38</sup>. Of  
434 note, given their co-expression patterns and redundant functions in regulating

435 signalling pathways, it may be better to target the whole family instead of single  
436 miRNAs when studying the effects of miRNAs on lineage differentiation<sup>39</sup>.

437 To further clarify the cellular events associated with spatiotemporal-specific small  
438 RNAs, we focused on groups of miRNAs that are synergistically upregulated or  
439 downregulated. The GO analysis of such targets revealed that biological processes  
440 were differentially associated with individual lineages. For examples, embryonic  
441 development, RNA metabolic process, and brain development are apparently  
442 correlated with HD, KD, and ND, respectively (Fig. 4A, B). Some of the cellular events  
443 are more likely responses to “stimuli” (growth factors and chemicals) added to the  
444 induction medium, whereas others may be triggered by the master factors (miRNAs  
445 and transcription factors) changed during differentiation. Notably, we used fold  
446 enrichment instead of the *P* value as the ranking criterion for biological processes, since  
447 we observed that the ones with a large number of expected genes (e.g. cellular  
448 metabolic process, cellular process) were always ranked in the top when considering  
449 the *P*-value. However, sorting fold enrichment, which reflects the ratio of  
450 overrepresented number of genes in the uploading list compared to the expected  
451 number of genes in the reference list<sup>30</sup>, allows the identification of other important  
452 biological processes to rank top despite small expected numbers of genes.

453 Taken together, our analysis filled the void with respect to small RNA expression  
454 dynamics in the human atlas for hPSC differentiation. Our results can be used as  
455 informative clues for investigating spatiotemporal-specific small RNAs and their roles  
456 in key decisions in human developmental processes. Meanwhile, the analysis  
457 framework can serve as a template for the comparisons of dynamic spatiotemporal  
458 transcriptome changes during diverse multilineage differentiation.

459

## 460 **Materials and Methods**

### 461 **Analysis of Small RNA expression in hPSCs and derived lineages**

462 Small RNAs microarray data of hPSC differentiating into three lineages have been  
463 published previously (Data citation 1)<sup>22,40-42</sup>. In brief, hPSCs were induced into  
464 representative lineages according to previously established protocols (hepatic, nephric  
465 and neuronal)<sup>40-42</sup>. RNA was extracted at four different timepoints (day 0, 3, 6, 10)  
466 for each lineage using the RecoverAll™ Total Nucleic Acid Isolation Kit for FFPE

467 (Thermo Fisher Scientific) and subjected to the microarray-based small RNA  
468 expression analysis using the Affymetrix miRNA 4.0 platform (Thermo Fisher  
469 Scientific) as described<sup>22</sup>. This dataset has been deposited in the gene expression  
470 omnibus (GEO) repository under the accession number GSE97952 (Data citation 1).  
471 The raw expression intensity values (expression values) were extracted using Partek®  
472 Genomics Suite® platform. To show human-specific information, human-specific  
473 probes were specifically selected.

474

#### 475 **TSI, NMTSI, and ASI**

476 To evaluate the variability of temporal expression patterns inside each lineage, we  
477 calculated a TSI for single small RNAs as described before<sup>25</sup>. This specificity index is  
478 a quantitative measurement for the expression specificity of small RNAs with regard to  
479 different timepoints. TSI has a range of 0 to 1, with values approximate to 0  
480 representing small RNAs that remained unchanged during differentiation and values  
481 approximate to 1 representing small RNAs that were expressed at only one timepoint.  
482 Considering that the fluctuation of expression values of the start timepoint (HD 0, KD 0,  
483 ND 0) have potential effects on the comparison of TSI between lineages, we used the  
484 average value of day 0 from three lineages (mean of HD 0, KD 0, and ND 0) as the  
485 expression value for HD 0, KD 0, and ND 0. The TSI for a small RNA  $j$  is calculated as

$$TSI_j = \frac{\sum_{i=1}^N (1 - x_{j,i})}{N - 1}$$

486 where  $N$  corresponds to the total number of timepoints measured and  $x_{j,i}$  is the  
487 expression value of timepoint  $i$  normalized by the maximum expression value of any  
488 timepoint for small RNA  $j$ .

489 To further identify the small RNAs that are changed in a timepoint-specific  
490 manner in only one lineage (spatiotemporal-specific small RNAs), we developed the  
491 Normalized Maximum TSI (NMTSI) based on TSI values. NMTSI values range from  
492 0.33 to 1. The small RNA with NMTSI value 0.33 is either upregulated or unchanged  
493 over all lineages, while the small RNA with NMTSI value 1 is upregulated in only one  
494 lineage. The NMTSI for a small RNA  $j$  is calculated as

$$NMTSI_j = \frac{\text{MAX}\{tsi_{j,1}, \dots, tsi_{j,i}\}}{\sum_{i=1}^N tsi_{j,i}}$$

495 where N corresponds to the total number of lineage measured and  $ts_{j,i}$  is the TSI value  
496 of lineage  $i$  for small RNA  $j$ . Specifically, HD, KD, and ND were assigned lineage 1,  
497 lineage 2, and lineage 3, respectively, in this paper.

498 To identify spatiotemporal-specific small RNAs highly expressed at the terminal  
499 timepoint (HD 10, KD 10, and ND 10), we calculated an ASI for each small RNAs  
500 analogous to the tissue specificity index ‘ $\tau$ ’ originally developed for mRNA<sup>26</sup>.  
501 Compared with TSI, ASI considers the variability of small RNA expression patterns  
502 between terminal timepoints of different lineages. The ASI for a small RNA  $j$  is  
503 calculated as

$$ASI_j = \frac{\sum_{i=1}^N (1 - y_{j,i})}{N - 1}$$

504 where N corresponds to the total number of lineages measured and  $y_{j,i}$  is the  
505 expression value at day 10 of lineage  $i$  normalized by the maximum expression value  
506 at day 10 of any lineage for small RNA  $j$ .

507

#### 508 **Identification of real spatiotemporal-specific small RNAs**

509 To identify real spatiotemporal-specific small RNAs from the candidate list that  
510 was generated via NMTSI analysis, we performed a filtration with a differential  
511 expression (DE). To analyze DE patterns of small RNAs during lineage specification,  
512 we compared the small RNA transcriptome between any two timepoints inside a  
513 lineage. A workflow for miRNA microarray analysis launched at Partek® Genomics  
514 Suite® was used. Specifically, HD-, KD-, and ND-specific candidate small RNAs were  
515 filtered with a cut-off of DE (absolute fold-change value of  $> 1$  and post hoc test  
516 FDR-value  $< 0.05$ ).

517 Similarly, to identify real spatiotemporal-specific small RNA from the candidate  
518 list that was generated via ASI analysis, we applied a filtration with DE. Particularly,  
519 we filtered IH-, MM-, NPC-specific candidate small RNAs with a cut-off of DE  
520 (absolute fold-change value of  $> 1$  and post hoc test FDR-value  $< 0.05$ ).

521

#### 522 **Expression of miRNA families**

523 To evaluate the spatiotemporal specificity of miRNA families, we selected miRNA  
524 families containing at least five mature miRNAs from the miRbase V21

525 (<ftp://mirbase.org/pub/mirbase/21/>; catalogued as miFAM.dat.gz or miFAM.dat.zip;  
526 accessed on 06/26/2018). For each miRNA precursor all mature forms are considered  
527 as family members. Replicated mature miRNAs coming from different precursors were  
528 only counted once. Average of ASI and quantities of spatiotemporal-specific miRNA  
529 family members (identified by ASI and DE analysis) inside families with respect to the  
530 terminal timepoint of different lineages (IH, MM, and NPC) were calculated.

531

### 532 ***In silico* identification of target genes of miRNAs**

533 Known human miRNA-target interactions were downloaded from the miRTarBase  
534 database (<http://mirtarbase.mbc.nctu.edu.tw/php/download.php>; catalogued as  
535 hsa\_MTI.xlsx; accessed on 04/02/2019). Spatiotemporal-specific miRNAs (identified  
536 by ASI and DE analysis) in each lineage were classified into upregulate groups (fold  
537 change > 1 when compared day 10 to day 0) and downregulated groups (fold change <  
538 -1 when compared day 10 to day 0). Downstream target genes of each group of  
539 miRNAs were retrieved taking miRNA names as the key.

540

### 541 **GO enrichment analysis**

542 The GO enrichment analysis for target genes was performed using the PANTHER  
543 version 14.1 (<http://www.pantherdb.org/tools/>). Statistical overrepresentation test with  
544 subterm “GO biological process complete” under the “Gene List Analysis” function  
545 with FDR < 0.05 were considered significantly enriched. Top 10 enriched GO terms  
546 (by fold enrichment) from each category were clustered manually into biologically  
547 related topics.

548

### 549 **The development of a search engine**

550 We adopted Python and used the Django framework in developing our website. To  
551 organize the data in a structured way, we defined a Django model and associated this  
552 model with a database table. We adopted Sqlite as our database management system,  
553 which hosts this table and serializes its data into a single file. All of our data was  
554 inserted into Sqlite automatically in batches by a shell script. If there is more data in the  
555 future, we can also insert them with this shell script or by accessing the Django admin  
556 webpage.

557 Our Sqlite table contains 21 columns corresponding to the 21 aspects of a probed  
558 small RNA. These 21 aspects include the probe ID, small RNA name, NMTSI, ASI,  
559 potential spatiotemporal specificity (NMTSI), potential spatiotemporal specificity  
560 (ASI), fold-change of HD 0, HD 3, HD 6, HD 10, KD 0, KD 3, KD 6, KD 10, ND 0, ND  
561 3, ND 6, ND 10, spatiotemporal specificity (NMTSI), spatiotemporal specificity (ASI),  
562 and miRNA family distributions. A row in this table uniquely records results for one  
563 probe. We assigned a probe ID rather than the small name as the primary key to index a  
564 row, since a small RNA may have multiple probes and thus take up multiple rows.

### 565 **Data Availability Statement**

566 The data that support the findings of this study are openly available in Figshare at  
567 10.6084/m9.figshare.9911918. The following have been uploaded to Figshare:  
568 expression values of all small RNAs; TSI values of small RNAs in HD, KD, and ND;  
569 NMTSI values of small RNAs for the calculation of NMTSI distribution; expression  
570 values of the most potential HD-, KD-, and ND-specific small RNAs; fold change of  
571 the most HD-, KD-, and ND-specific small RNAs; ASI values of small RNAs for the  
572 calculation of ASI distribution; expression values of the most potential IH-, MM-, and  
573 NPC-specific small RNAs; fold change of the most IH-, MM-, and NPC-specific small  
574 RNAs; average and SD of ASI of miRNA families in three lineages; distribution of 37  
575 miRNA families in three lineages; and summary of top 10 GO terms related with  
576 spatiotemporal-specific small RNAs.

577

### 578 **Code Availability Statement**

579 The scripts used to design the search engine are available from  
580 GitHub: <https://github.com/keyminer/hsra>.

### 581 **Reference**

- 582 1 Zhu, Z. & Huangfu, D. Human pluripotent stem cells: an emerging model in  
583 developmental biology. *Development* **140**, 705-717, doi:10.1242/dev.086165  
584 (2013).
- 585 2 Avior, Y., Sagi, I. & Benvenisty, N. Pluripotent stem cells in disease modelling and  
586 drug discovery. *Nat Rev Mol Cell Biol* **17**, 170-182, doi:10.1038/nrm.2015.27  
587 (2016).

- 588 3 Trounson, A. & DeWitt, N. D. Pluripotent stem cells progressing to the clinic. *Nat*  
589 *Rev Mol Cell Biol* **17**, 194-200, doi:10.1038/nrm.2016.10 (2016).
- 590 4 Fox, I. J. *et al.* Stem cell therapy. Use of differentiated pluripotent stem cells as  
591 replacement therapy for treating disease. *Science* **345**, 1247391,  
592 doi:10.1126/science.1247391 (2014).
- 593 5 Yi, H. *et al.* Gene expression atlas for human embryogenesis. *FASEB J* **24**,  
594 3341-3350, doi:10.1096/fj.10-158782 (2010).
- 595 6 Durruthy-Durruthy, J. *et al.* Spatiotemporal Reconstruction of the Human  
596 Blastocyst by Single-Cell Gene-Expression Analysis Informs Induction of Naive  
597 Pluripotency. *Dev Cell* **38**, 100-115, doi:10.1016/j.devcel.2016.06.014 (2016).
- 598 7 Gifford, C. A. *et al.* Transcriptional and epigenetic dynamics during specification  
599 of human embryonic stem cells. *Cell* **153**, 1149-1163,  
600 doi:10.1016/j.cell.2013.04.037 (2013).
- 601 8 Xie, W. *et al.* Epigenomic analysis of multilineage differentiation of human  
602 embryonic stem cells. *Cell* **153**, 1134-1148, doi:10.1016/j.cell.2013.04.022  
603 (2013).
- 604 9 Young, R. A. Control of the embryonic stem cell state. *Cell* **144**, 940-954,  
605 doi:10.1016/j.cell.2011.01.032 (2011).
- 606 10 Hinton, A. *et al.* A distinct microRNA signature for definitive endoderm derived  
607 from human embryonic stem cells. *Stem Cells Dev* **19**, 797-807,  
608 doi:10.1089/scd.2009.0224 (2010).
- 609 11 Hinton, A. *et al.* sRNA-seq analysis of human embryonic stem cells and definitive  
610 endoderm reveals differentially expressed microRNAs and novel IsomiRs with  
611 distinct targets. *Stem Cells* **32**, 2360-2372, doi:10.1002/stem.1739 (2014).
- 612 12 Ishikawa, D. *et al.* miRNome Profiling of Purified Endoderm and Mesoderm  
613 Differentiated from hESCs Reveals Functions of miR-483-3p and miR-1263 for  
614 Cell-Fate Decisions. *Stem Cell Reports* **9**, 1588-1603,  
615 doi:10.1016/j.stemcr.2017.10.011 (2017).
- 616 13 Joglekar, M. V., Joglekar, V. M. & Hardikar, A. A. Expression of islet-specific  
617 microRNAs during human pancreatic development. *Gene Expr Patterns* **9**,  
618 109-113, doi:10.1016/j.gep.2008.10.001 (2009).
- 619 14 Liao, X. *et al.* Matched miRNA and mRNA signatures from an hESC-based in vitro

- 620 model of pancreatic differentiation reveal novel regulatory interactions. *J Cell Sci*  
621 **126**, 3848-3861, doi:10.1242/jcs.123570 (2013).
- 622 15 Ludwig, N. *et al.* Distribution of miRNA expression across human tissues. *Nucleic*  
623 *Acids Res* **44**, 3865-3877, doi:10.1093/nar/gkw116 (2016).
- 624 16 Suh, N. & Blelloch, R. Small RNAs in early mammalian development: from  
625 gametes to gastrulation. *Development* **138**, 1653-1661, doi:10.1242/dev.056234  
626 (2011).
- 627 17 Boyer, L. A. *et al.* Core transcriptional regulatory circuitry in human embryonic  
628 stem cells. *Cell* **122**, 947-956, doi:10.1016/j.cell.2005.08.020 (2005).
- 629 18 Marson, A. *et al.* Connecting microRNA genes to the core transcriptional  
630 regulatory circuitry of embryonic stem cells. *Cell* **134**, 521-533,  
631 doi:10.1016/j.cell.2008.07.020 (2008).
- 632 19 Neilson, J. R., Zheng, G. X., Burge, C. B. & Sharp, P. A. Dynamic regulation of miRNA  
633 expression in ordered stages of cellular development. *Genes Dev* **21**, 578-589,  
634 doi:10.1101/gad.1522907 (2007).
- 635 20 Le, M. T. *et al.* MicroRNA-125b promotes neuronal differentiation in human cells  
636 by repressing multiple targets. *Mol Cell Biol* **29**, 5290-5305,  
637 doi:10.1128/MCB.01694-08 (2009).
- 638 21 Kassambara, A. *et al.* Global miRNA expression analysis identifies novel key  
639 regulators of plasma cell differentiation and malignant plasma cell. *Nucleic Acids*  
640 *Res* **45**, 5639-5652, doi:10.1093/nar/gkx327 (2017).
- 641 22 Li, L., Miu, K. K., Gu, S., Cheung, H. H. & Chan, W. Y. Comparison of multi-lineage  
642 differentiation of hiPSCs reveals novel miRNAs that regulate lineage specification.  
643 *Sci Rep* **8**, 9630, doi:10.1038/s41598-018-27719-0 (2018).
- 644 23 Jiang, X. P., Ai, W. B., Wan, L. Y., Zhang, Y. Q. & Wu, J. F. The roles of microRNA  
645 families in hepatic fibrosis. *Cell Biosci* **7**, 34, doi:10.1186/s13578-017-0161-7  
646 (2017).
- 647 24 Broughton, J. P., Lovci, M. T., Huang, J. L., Yeo, G. W. & Pasquinelli, A. E. Pairing  
648 beyond the Seed Supports MicroRNA Targeting Specificity. *Mol Cell* **64**, 320-333,  
649 doi:10.1016/j.molcel.2016.09.004 (2016).
- 650 25 Tu, J., Cao, D., Li, L., Cheung, H. H. & Chan, W. Y. MicroRNA profiling during  
651 directed differentiation of cortical interneurons from human-induced



- 652 pluripotent stem cells. *FEBS Open Bio* **8**, 502-512,  
653 doi:10.1002/2211-5463.12377 (2018).
- 654 26 Yanai, I. *et al.* Genome-wide midrange transcription profiles reveal expression  
655 level relationships in human tissue specification. *Bioinformatics* **21**, 650-659,  
656 doi:10.1093/bioinformatics/bti042 (2005).
- 657 27 Zhao, C., Sun, G., Li, S. & Shi, Y. A feedback regulatory loop involving microRNA-9  
658 and nuclear receptor TLX in neural stem cell fate determination. *Nat Struct Mol*  
659 *Biol* **16**, 365-371, doi:10.1038/nsmb.1576 (2009).
- 660 28 Boissart, C., Nissan, X., Giraud-Triboulet, K., Peschanski, M. & Benchoua, A.  
661 miR-125 potentiates early neural specification of human embryonic stem cells.  
662 *Development* **139**, 1247-1257, doi:10.1242/dev.073627 (2012).
- 663 29 Kozomara, A. & Griffiths-Jones, S. miRBase: annotating high confidence  
664 microRNAs using deep sequencing data. *Nucleic Acids Res* **42**, D68-73,  
665 doi:10.1093/nar/gkt1181 (2014).
- 666 30 Mi, H. *et al.* PANTHER version 11: expanded annotation data from Gene Ontology  
667 and Reactome pathways, and data analysis tool enhancements. *Nucleic Acids Res*  
668 **45**, D183-D189, doi:10.1093/nar/gkw1138 (2017).
- 669 31 Ivey, K. N. & Srivastava, D. MicroRNAs as regulators of differentiation and cell fate  
670 decisions. *Cell Stem Cell* **7**, 36-41, doi:10.1016/j.stem.2010.06.012 (2010).
- 671 32 Kim, Y. *et al.* Lineage-specific Expression of miR-200 Family in Human  
672 Embryonic Stem Cells during In Vitro Differentiation. *Int J Stem Cells* **10**, 28-37,  
673 doi:10.15283/ijsc17013 (2017).
- 674 33 Jopling, C. Liver-specific microRNA-122: Biogenesis and function. *RNA Biol* **9**,  
675 137-142, doi:10.4161/rna.18827 (2012).
- 676 34 Davoodian, N., Lotfi, A. S., Soleimani, M. & Mowla, S. J. MicroRNA-122  
677 overexpression promotes hepatic differentiation of human adipose  
678 tissue-derived stem cells. *J Cell Biochem* **115**, 1582-1593, doi:10.1002/jcb.24822  
679 (2014).
- 680 35 Deng, X. G. *et al.* Overexpression of miR-122 promotes the hepatic differentiation  
681 and maturation of mouse ESCs through a miR-122/FoxA1/HNF4a-positive  
682 feedback loop. *Liver Int* **34**, 281-295, doi:10.1111/liv.12239 (2014).
- 683 36 Kawahara, H., Imai, T. & Okano, H. MicroRNAs in Neural Stem Cells and

- 684 Neurogenesis. *Front Neurosci* **6**, 30, doi:10.3389/fnins.2012.00030 (2012).
- 685 37 Bian, S., Xu, T. L. & Sun, T. Tuning the cell fate of neurons and glia by microRNAs.
- 686 *Curr Opin Neurobiol* **23**, 928-934, doi:10.1016/j.conb.2013.08.002 (2013).
- 687 38 Bartel, D. P. MicroRNAs: target recognition and regulatory functions. *Cell* **136**,
- 688 215-233, doi:10.1016/j.cell.2009.01.002 (2009).
- 689 39 Fischer, S., Handrick, R., Aschrafi, A. & Otte, K. Unveiling the principle of
- 690 microRNA-mediated redundancy in cellular pathway regulation. *RNA Biol* **12**,
- 691 238-247, doi:10.1080/15476286.2015.1017238 (2015).
- 692 40 Chen, Y. F. *et al.* Rapid generation of mature hepatocyte-like cells from human
- 693 induced pluripotent stem cells by an efficient three-step protocol. *Hepatology* **55**,
- 694 1193-1203, doi:10.1002/hep.24790 (2012).
- 695 41 Mohamad, O. *et al.* Vector-free and transgene-free human iPS cells differentiate
- 696 into functional neurons and enhance functional recovery after ischemic stroke in
- 697 mice. *PLoS One* **8**, e64160, doi:10.1371/journal.pone.0064160 (2013).
- 698 42 Takasato, M. *et al.* Directing human embryonic stem cell differentiation towards a
- 699 renal lineage generates a self-organizing kidney. *Nat Cell Biol* **16**, 118-126,
- 700 doi:10.1038/ncb2894 (2014).

701

## 702 **Data Citations**

- 703 1. Li, L., Chan, W. Y. & Cheung, H. H. *Gene expression Omnibus* GSE97952 (2018).
- 704

## 705 **Author Contributions**

706 L.L., and W.Y.C. conceived the project. L.L., J.F.L., and D.D.C. designed the

707 experiments. L.L., and J.F.L. conducted the experiments. L.L., and J.F.L. analyzed the

708 data and wrote the manuscript. W.Y.C. and V.P. co-wrote and edited the manuscript.

709

## 710 **Acknowledgements**

711 This work was supported in part by the CUHK VC One-Off Discretionary Fund

712 (Project 4930732) and the One-Off Funding for Joint Lab/Research Collaboration

713 (Project 3132966) provided to the CUHK-CAS GIBH Joint Laboratory on Stem Cell

714 and Regenerative Medicine, the Lo Kwee-Seong Biomedical Research Fund, and  
715 Project Stem Cell Therapy of Liver Diseases: An Investigation (2015CB964700), 973  
716 Scheme, Ministry of Science and Technology, China.

717

## 718 **Conflict of Interest**

719 The authors declare that they have no conflicts of interest.

720

## 721 **Table Legends**

### 722 **Table S1. TSI, NMTSI and potential spatiotemporal specificity of small RNAs.**

723 Summary of timepoint specificity index (TSI), normalized maximum TSI (NMTSI),  
724 and spatiotemporal specificity of 6609 small RNAs that are observed with microarrays.  
725 Column A and B show the ID of probes and corresponding name of small RNAs. The  
726 degree of temporal specificity of small RNAs is evaluated by TSI, the value of which in  
727 hepatocyte differentiation (HD), nephron progenitor differentiation (KD), and neural  
728 progenitor differentiation (ND) is shown in column C, D, and E, respectively. The  
729 spatiotemporal specificity of a small RNA is established as the lineage with the highest  
730 TSI among HD, KD, and ND (column F). The degree of spatiotemporal specificity of  
731 small RNAs is estimated by NMTSI values (column G) that is calculated using TSI  
732 values of HD, KD, and ND. Small RNAs are sorted with decreasing NMTSI values  
733 from top to bottom. Top 100 small RNAs with high NMTSI values ( $> 0.673$ ) are  
734 indicated by the blue background.

735

### 736 **Table S2. Spatiotemporal-specific small RNA indicated by NMTSI and DE.**

737 Listing of 1130 real spatiotemporal-specific small RNAs with both spatiotemporal  
738 specificity (from NMTSI analysis) and DE (absolute fold-change  $> 1$  and post hoc test  
739 FDR-value  $< 0.05$  between any of two timepoints). Column A to E show the probe ID,  
740 small RNAs name, small RNA type, spatiotemporal specificity, and NMTSI. Results of  
741 one-way ANOVA *P*-value, fold-change value and post hoc test FDR-value are  
742 generated from the comparison of expression values between any of two timepoints.  
743 These results are listed from column F to DN. HD-specific small RNAs (yellow  
744 background), KD-specific small RNAs (blue background), and ND-specific small

745 RNAs (red background) are grouped together according to their spatiotemporal  
746 specificity.

747

748 **Table S3. ASI and spatial specificity of small RNAs.**

749 Summary of mean expression values of the terminal timepoint of the three lineages  
750 (HD, KD, and ND), across-tissue specificity index (ASI), and spatial specificity of  
751 6609 small RNAs that are observed with microarrays. The degree of spatial specificity  
752 of small RNAs is evaluated by ASI (column F). ASI values are calculated based on  
753 mean expression values of the terminal timepoint (day 10) of the three lineages that are  
754 corresponding to three tissues, namely, immature hepatocyte (IH), metanephric  
755 mesenchyme (MM), and neural progenitors (NPC). The mean expression values of IH,  
756 MM, and NPC are shown in column C, D, and E, respectively. The spatial specificity of  
757 a small RNA is established as the tissue with the highest expression values among IH,  
758 MM, and NPC (column G). Small RNAs are sorted with decreasing ASI values from  
759 top to bottom.

760

761 **Table S4. Spatiotemporal-specific small RNA indicated by ASI and DE.**

762 Listing of 1318 real spatiotemporal-specific small RNAs with both spatial specificity  
763 (from ASI analysis) and temporal specificity (absolute fold-change > 1 and post hoc  
764 test FDR-value < 0.05 between any of two timepoints). Column A to E show the probe  
765 ID, small RNAs name, small RNA type, spatiotemporal specificity, and ASI. Results of  
766 one-way ANOVA *P*-value, fold-change value and post hoc test FDR-value are  
767 generated from the comparison of expression values between any of two timepoints.  
768 These results are listed from column F to DN. IH-specific small RNAs (yellow  
769 background), MM-specific small RNAs (blue background), and NPC-specific small  
770 RNAs (red background) are grouped together according to their spatiotemporal  
771 specificity.

772

773 **Table S5. Spatiotemporal specificity of miRNA families.**

774 Summary of spatiotemporal distribution of 37 miRNA families that contain at least five  
775 family members. Column A, B, and C show the family name (labelled in red), total  
776 number and name of family members of each miRNA family. MiRNA families are

777 sorted with a decreasing number of family members from top to bottom. All family  
778 members are grouped together according to their families. IH-specific miRNAs and  
779 their ASI are listed in column D and E. The number and mean ASI of IH-specific  
780 miRNA are calculated based on column D and E and listed in column F and G.  
781 Similarly, the tissue distribution of MM-specific small RNAs inside each family are  
782 listed from column I to L. The tissue distribution of NPC-specific small RNAs inside  
783 each family are listed from column N to Q. Results associated with IH, MM, and NPC  
784 are labelled in the yellow, blue, and red background, respectively.

785

786 **Table S6. Spatiotemporal-specific miRNAs indicated by ASI and their**  
787 **downstream targets.**

788 Listing of 618 real spatiotemporal-specific miRNAs with spatial specificity (from ASI  
789 analysis) and temporal specificity (absolute fold-change > 1 and post hoc test  
790 FDR-value < 0.05 between day 0 and day 10). The spatiotemporal-specific miRNAs  
791 are classified into 6 groups, corresponding to miRNAs being upregulated at HD 10, KD  
792 10, and ND 10 (fold change > 1 when compared day 10 to day 0) or miRNAs being  
793 downregulated at HD 10, KD 10, and ND 10 (fold change < -1 when compared day 10  
794 to day 0). Column A, C, E, G, I, and K show six groups of spatiotemporal-specific  
795 miRNAs. Correspondingly, column B, D, F, H, J, and L show downstream target genes  
796 of each group of miRNAs that are identified *in silico* using miRTarBase.

797

798 **Table S7. GO enrichment analysis.**

799 Listing of all significant biological processes associated with six groups of downstream  
800 targets of spatiotemporal-specific miRNAs. Column A show gene ontology (GO) terms  
801 of biological processes associated with each group. Column B, C, and D show the  
802 number of genes in the reference list, the actual number of genes in each group  
803 (uploading list), and the expected number of genes in each group (uploading list)  
804 related to each GO term, respectively. Column E to H show the over or under status  
805 (compared to 1) according to fold enrichment, fold enrichment, raw *P*-value, and FDR,  
806 respectively. The GO terms are grouped together according to their associated gene  
807 lists. Within each group, GO terms are sorted with decreasing fold enrichment from top  
808 to bottom.



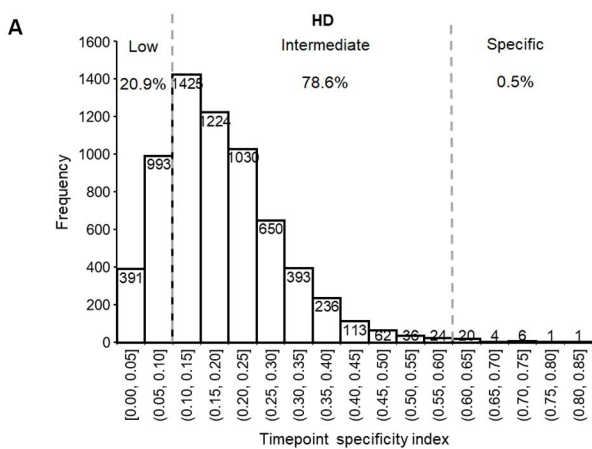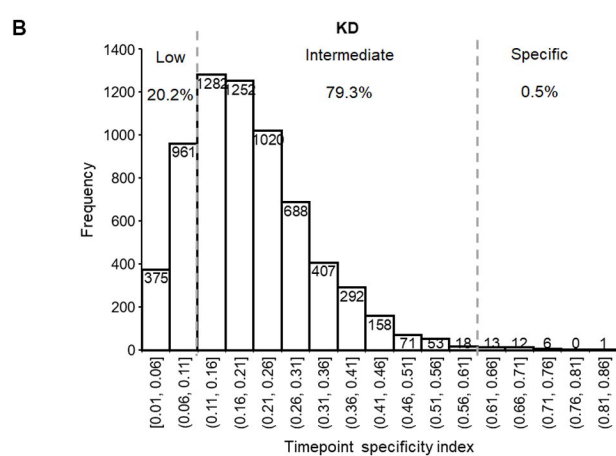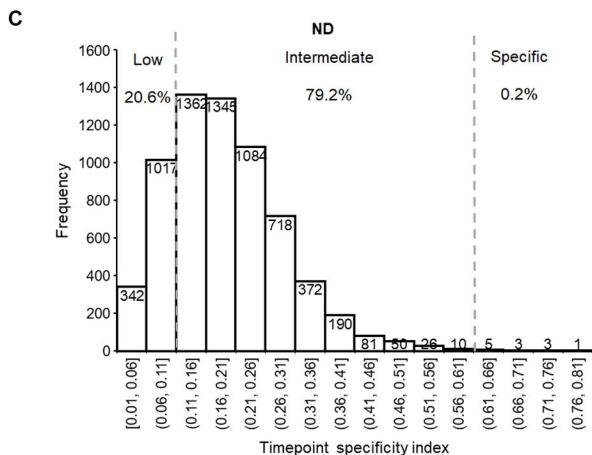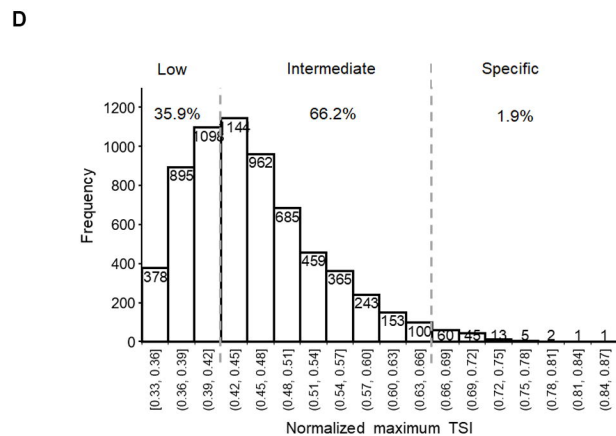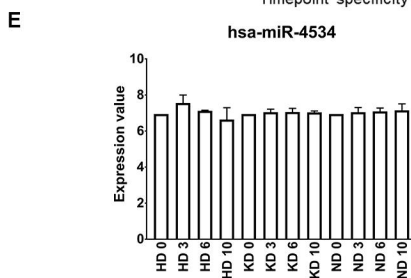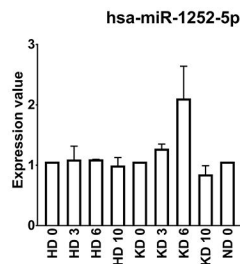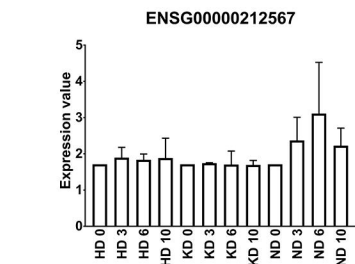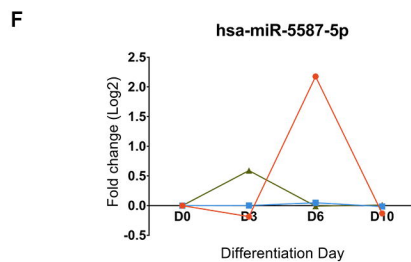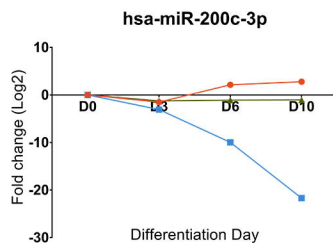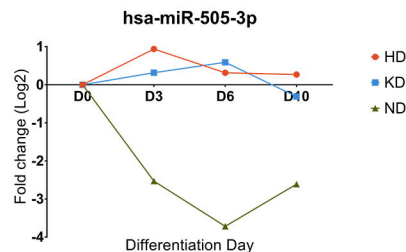

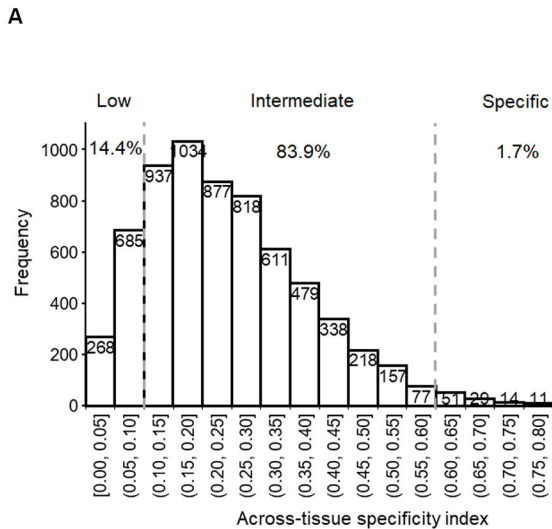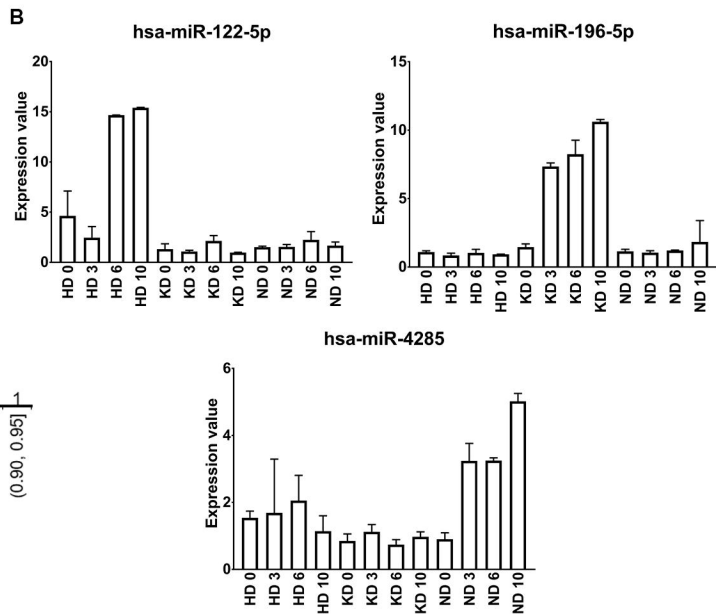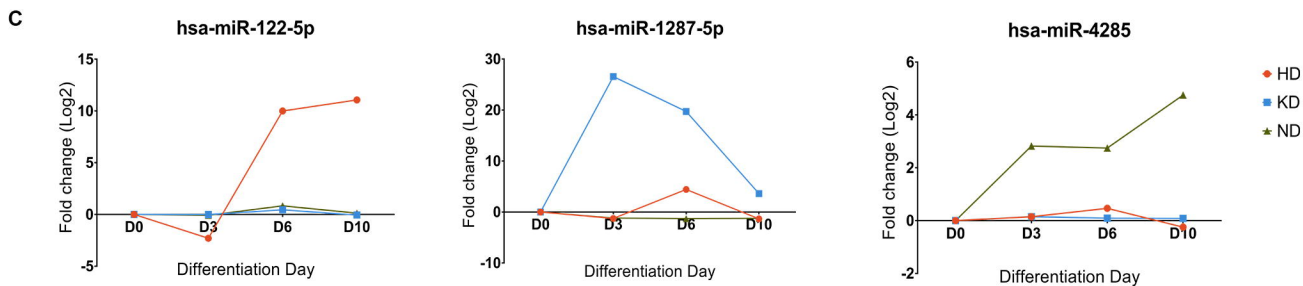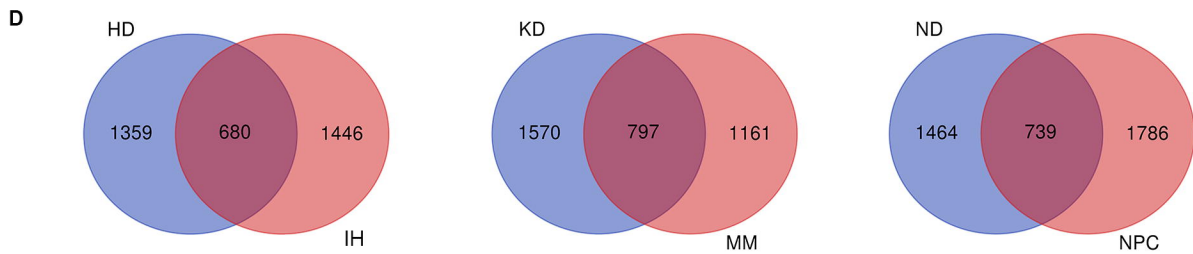



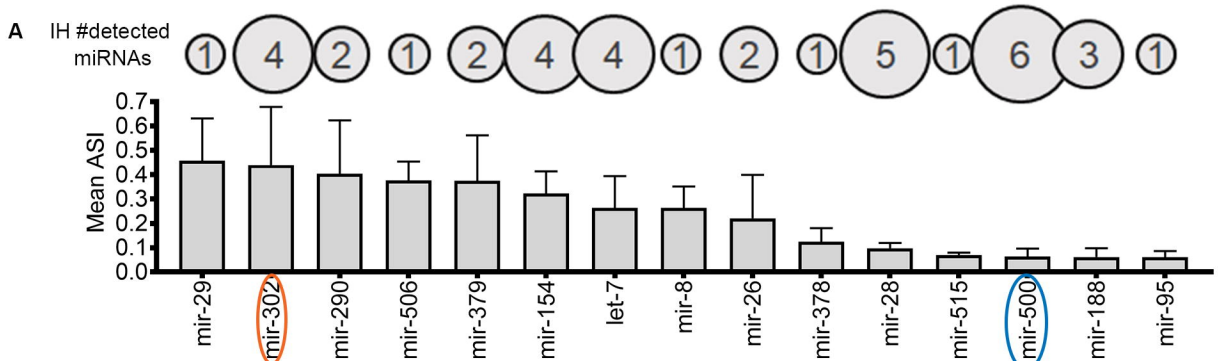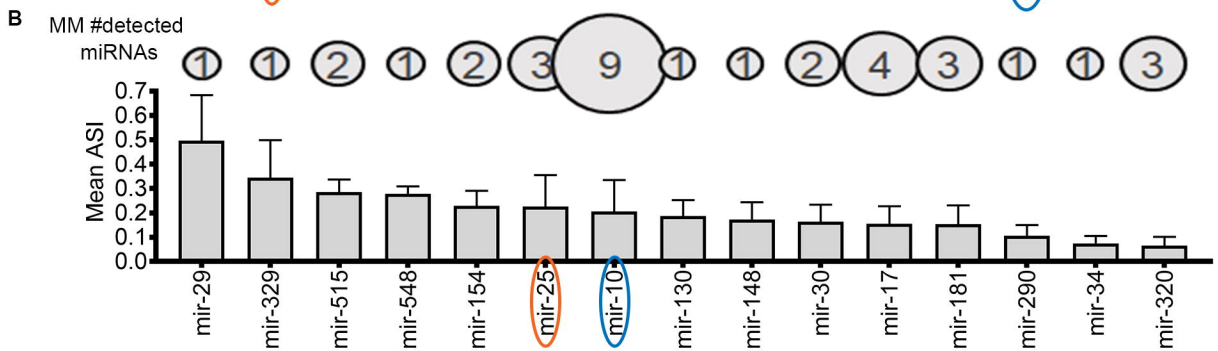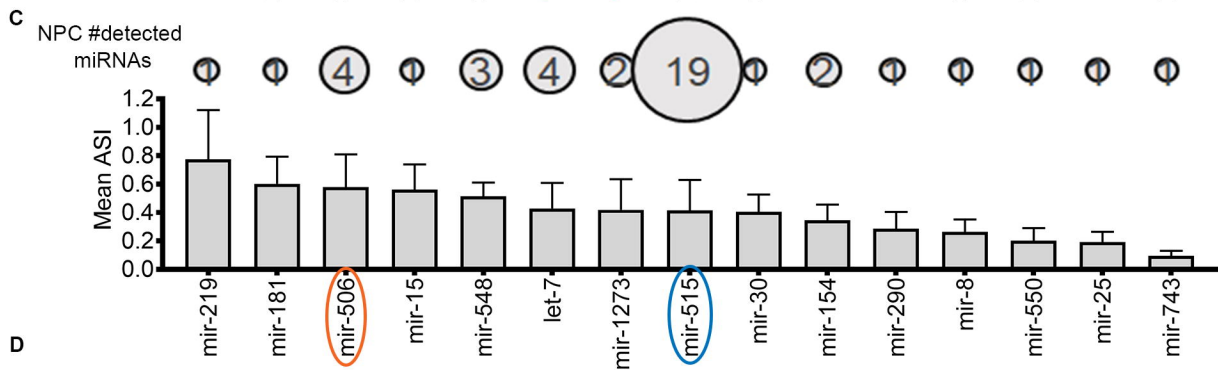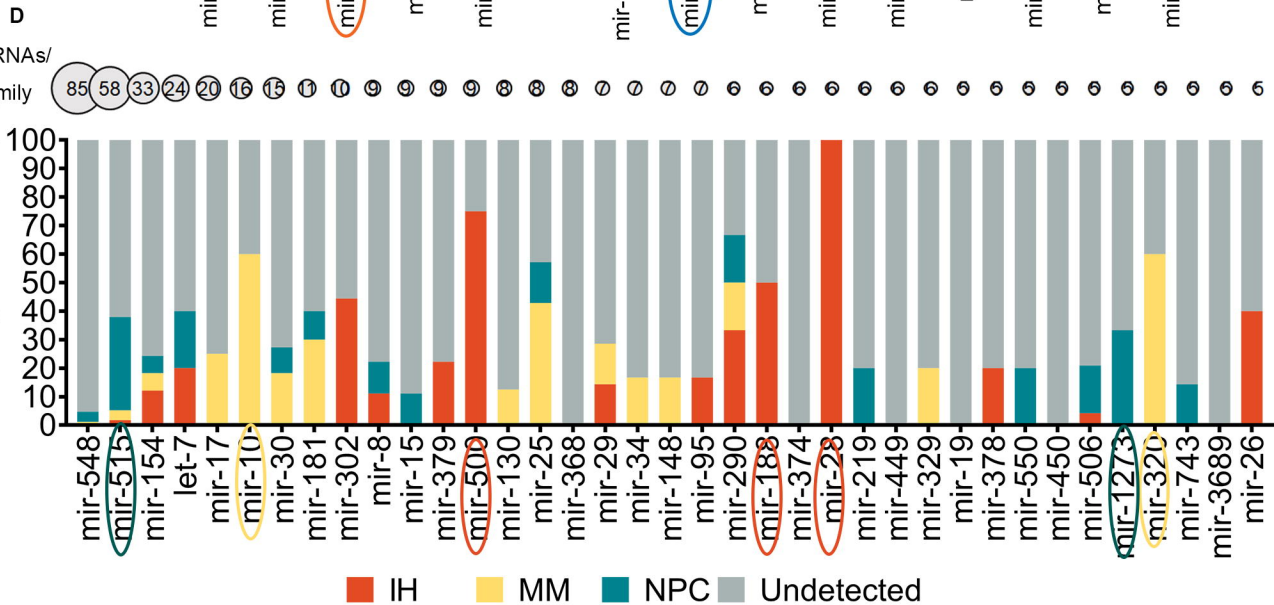

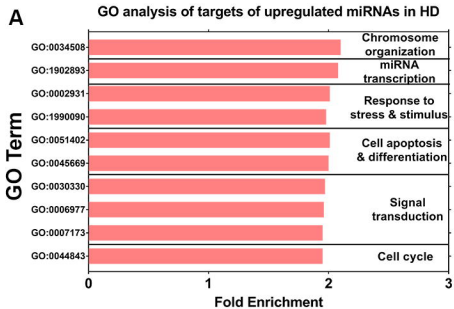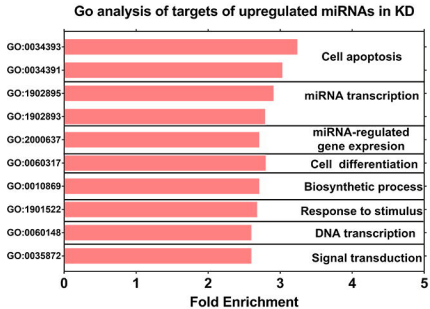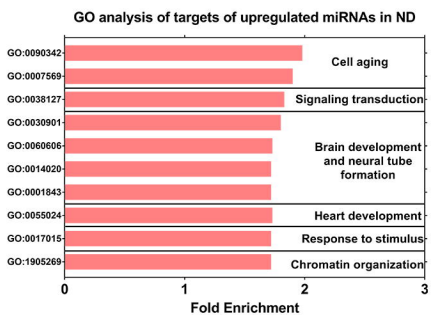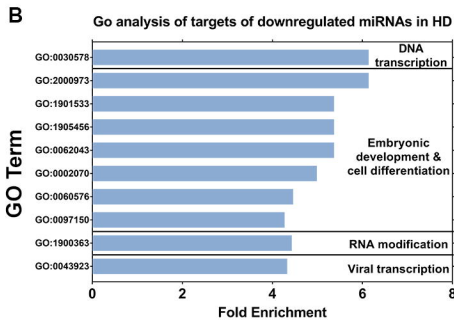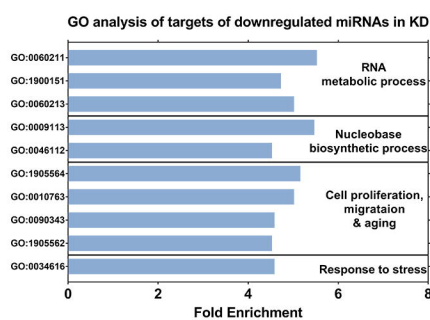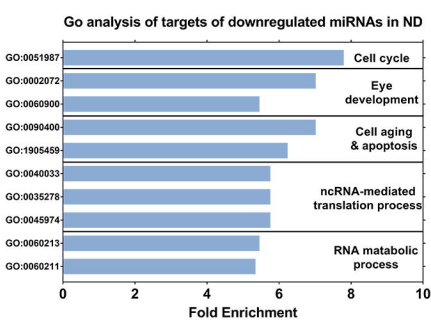

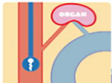

# Human Small RNA Atlas

Small RNA Name:

← Search Box of Name

Basic:

| Probe           | Name            | NMTSI        | ASI          | Potential Specificity (NMTSI) | Potential Specificity (ASI) |
|-----------------|-----------------|--------------|--------------|-------------------------------|-----------------------------|
| MIMAT0000257_st | hsa-miR-181b-5p | 0.3821346230 | 0.1445562710 | KD                            | MM                          |

← Basic Information

Fold Change:

| HD0    | HD3     | HD6     | HD10   | KD0    | KD3     | KD6    | KD10    | ND0    | ND3     | ND6     | ND10   |
|--------|---------|---------|--------|--------|---------|--------|---------|--------|---------|---------|--------|
| 0.0000 | -3.2982 | -4.4158 | 3.3246 | 0.0000 | -1.1946 | 3.7699 | 80.7588 | 0.0000 | -6.6546 | -3.1950 | 1.4761 |

← Fold Change

Spatiotemporal Specificity:

| Actual Specificity (NMTSI) | Actual Specificity (ASI) |
|----------------------------|--------------------------|
| KD                         | MM                       |

← Spatiotemporal Specificity

miRNA Family Distribution:

- miRNA Member: hsa-miR-181b-5p.
- miRNA Family: mir-181

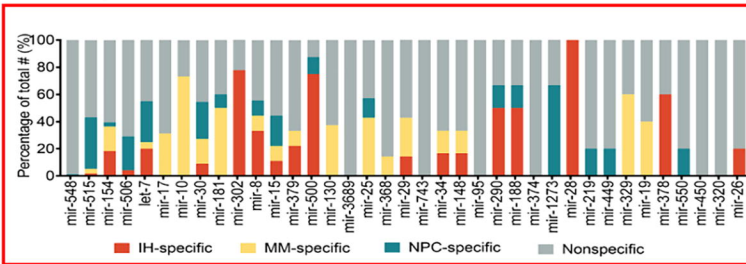

← miRNA Family Distribution
